# Supplementary material for: Antihypertensive Treatment in Kidney Transplant Recipients—A Current Single Center Experience
Source: MDPI journal article supplement (doi:10.3390/jcm9123969), 2020-12-07
Supplement: s1 [file s1]

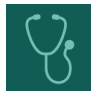

**Supplementary Materials:** The following are available online at [www.mdpi.com/2077-0383/9/12/3969/s1](http://www.mdpi.com/2077-0383/9/12/3969/s1)

### Unadjusted survival plots for different drug classes

Supplementary Figure S4A:

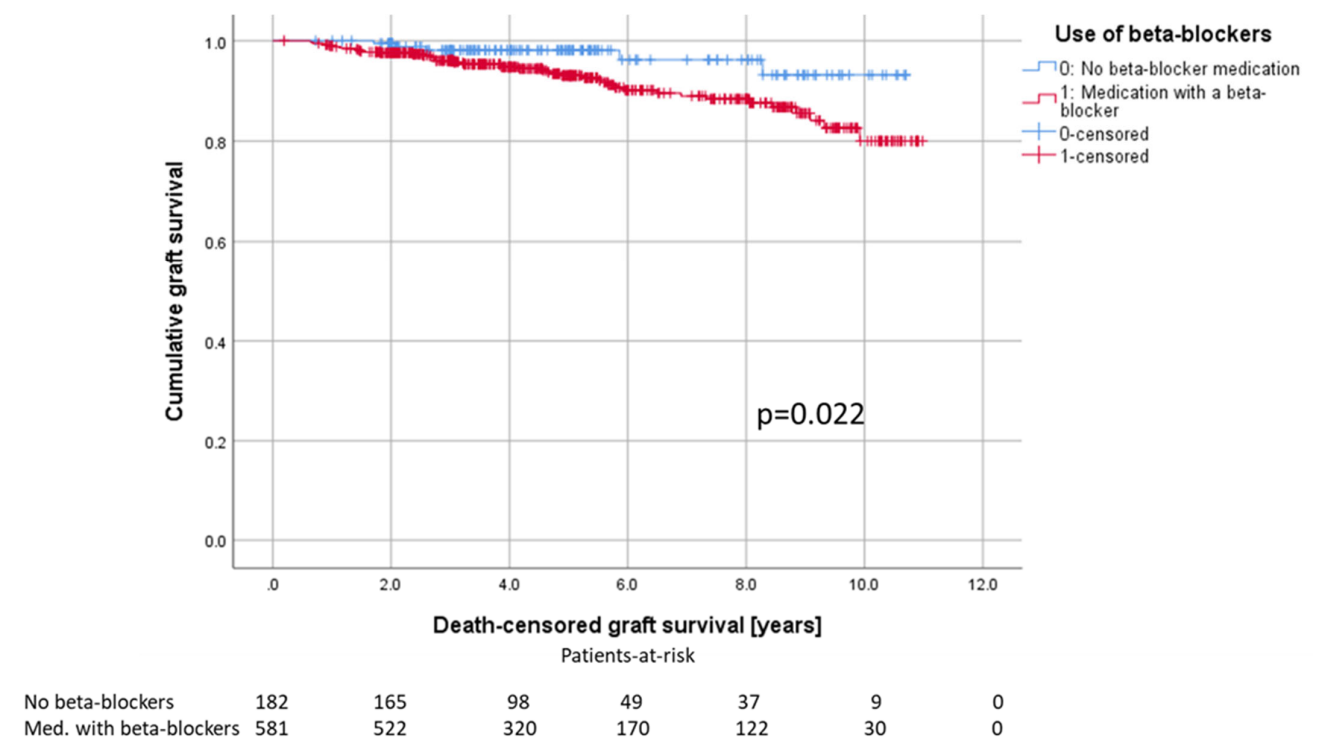

Supplementary Figure S4B:

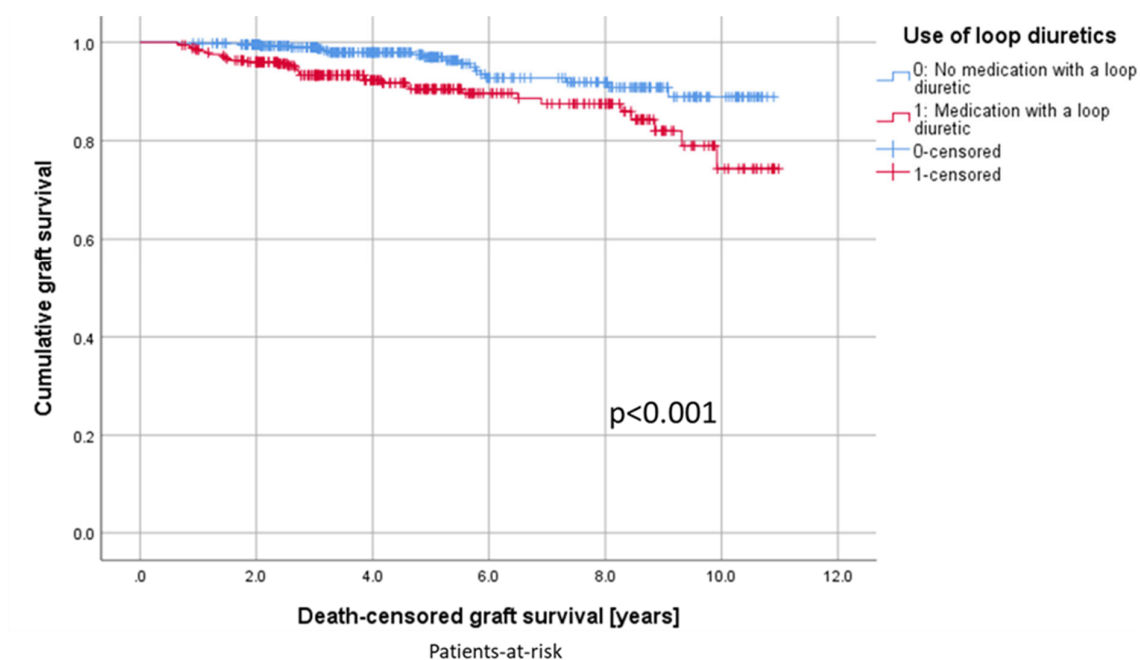

Supplementary Figure S4C:

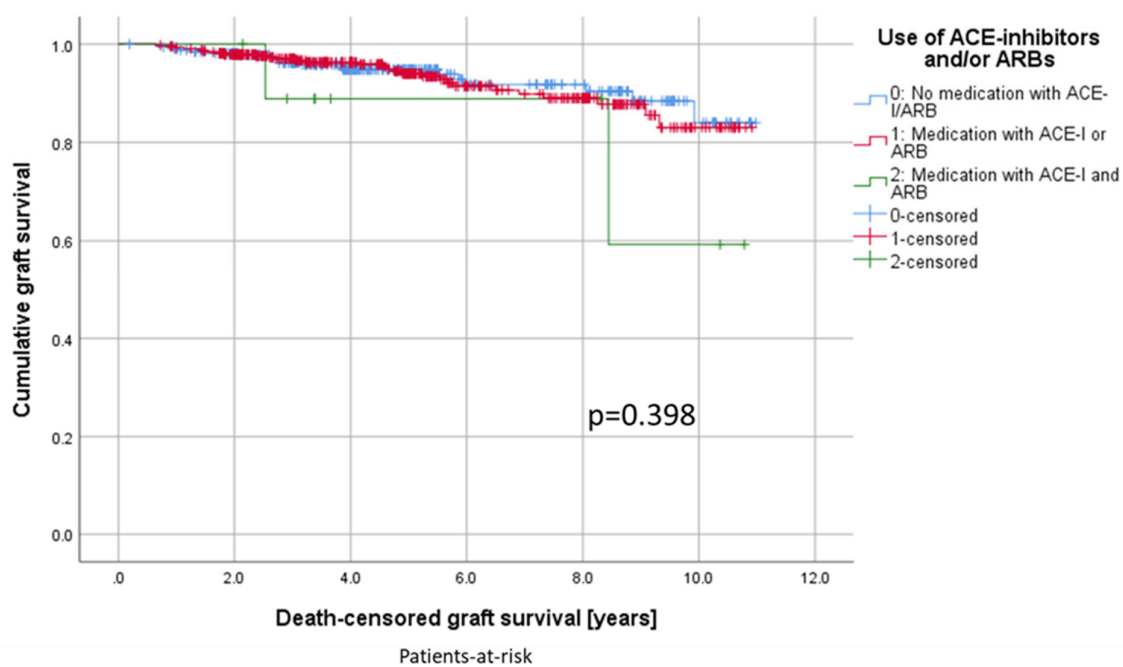

Supplementary Figure S4D:

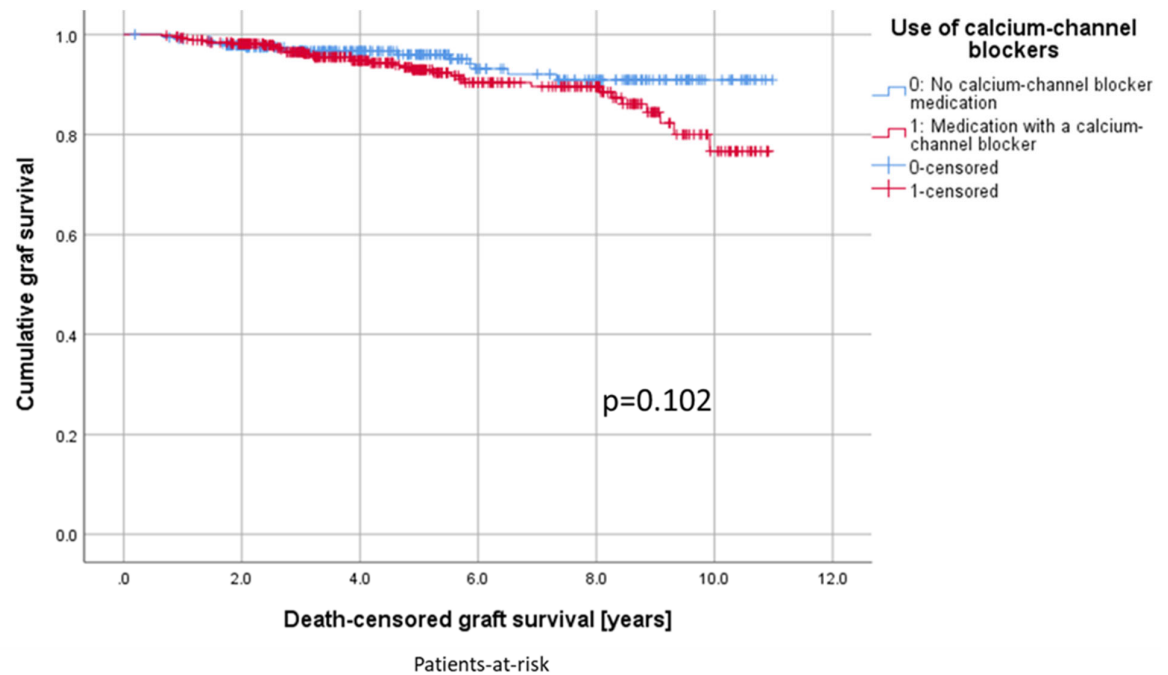

**Suppl. Figure 4:** Patients treated with beta-blockers show unfavorable death-censored graft survival compared to those without, Log-rank test,  $p=0.022$  (A). Those treated with loop diuretics also show unfavorable death-censored graft survival compared to those without, Log-rank test,  $p=0.001$  (B). In contrast, the use of ACE-I/ARBs does not influence death censored allograft survival, Log-rank test,  $p=0.398$  (C). Likewise, there is no difference in the death-censored allograft survival between patients with and without CCB medication, Log-rank test,  $p=0.102$  (D)
